# Supplementary material for: DNA interference and beyond: structure and functions of prokaryotic Argonaute proteins
Source: PubMed Central journal article supplement (PMC6279821; doi:10.1038/s41467-018-07449-7), 2018-12-04
Supplement: 41467_2018_7449_MOESM1_ESM.pdf [file 41467_2018_7449_MOESM1_ESM.pdf]

**DNA interference and beyond:  
structure and functions of prokaryotic Argonaute proteins**

Lidiya Lisitskaya<sup>1</sup>, Alexei A. Aravin<sup>1,2\*</sup>, Andrey Kulbachinskiy<sup>1\*</sup>

<sup>1</sup> Institute of Molecular Genetics, Russian Academy of Sciences, Moscow 123182, Russia

<sup>2</sup> Division of Biology and Biological Engineering, California Institute of Technology, Pasadena, CA 91125, USA

**Supplementary information**

This document contains four Supplementary Figures 1-4 and Supplementary Table 1.

**Supplementary Fig. 1. Comparison of known structures of pAgo (a) and eAgo (b) proteins.** (*next page*)

The structural elements are colored as follows: N-domain, turquoise; L1, yellow; PAZ, magenta; L2, grey; MID, orange; PIWI, green. The guide strand is blue, the target strand is black. Metal ions bound in the MID-pocket ( $5'Me^{2+}$ ) or in the active centre ( $acMe^{2+}$ ) are indicated. Arrows indicate major changes in the PAZ domain orientation. The PDB accession numbers are shown next to each structure.

**a**

pAgos

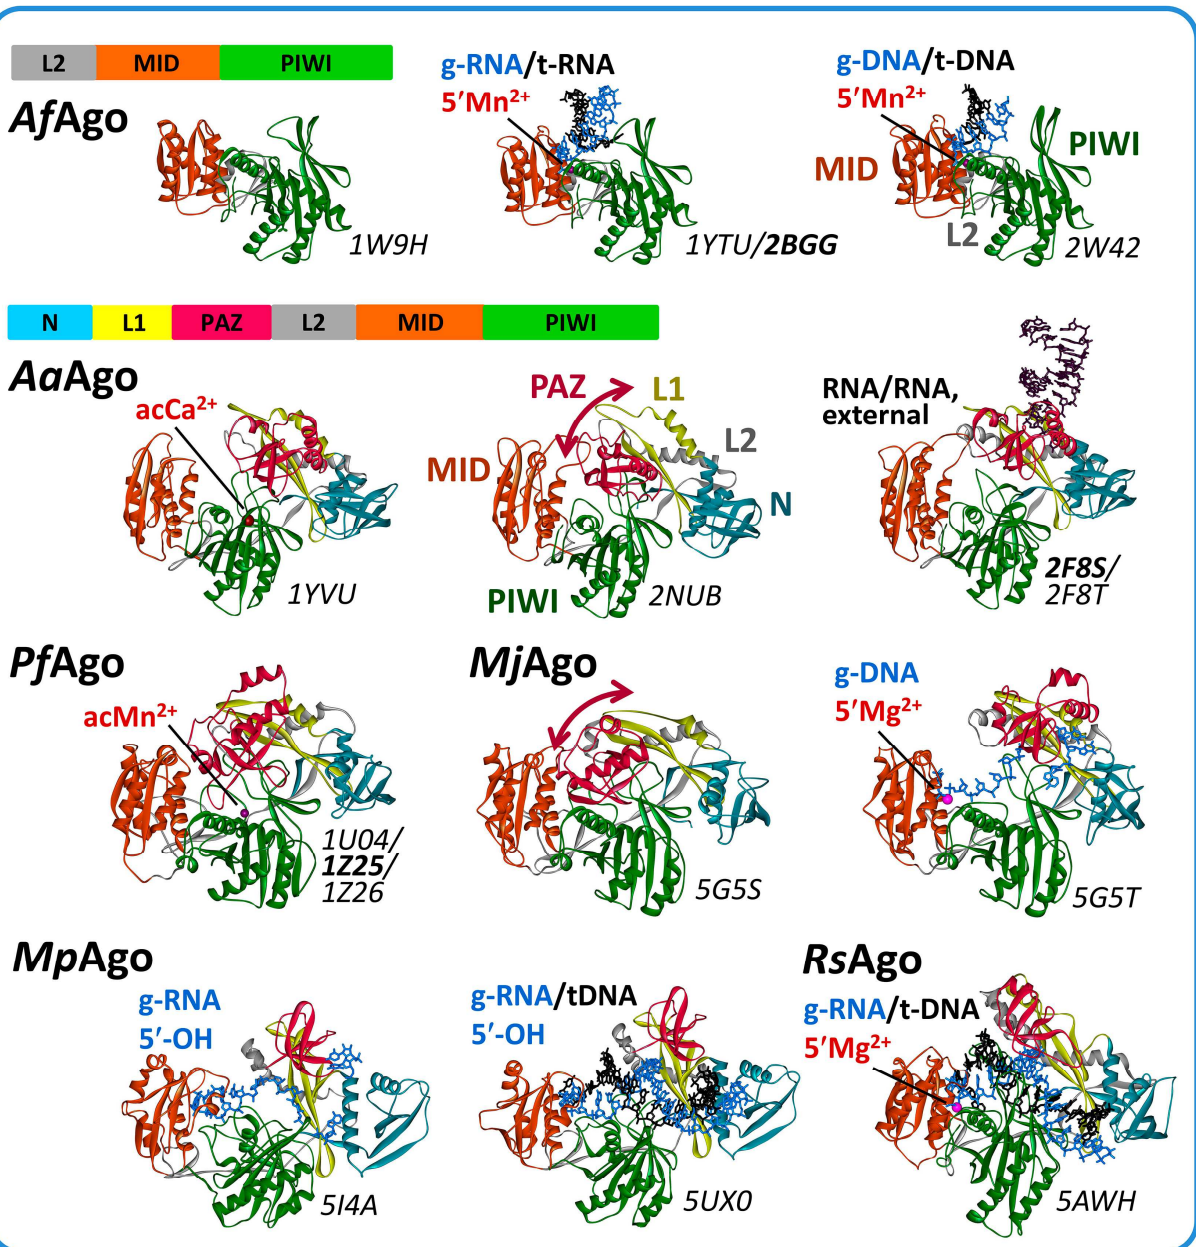**b**

eAgos

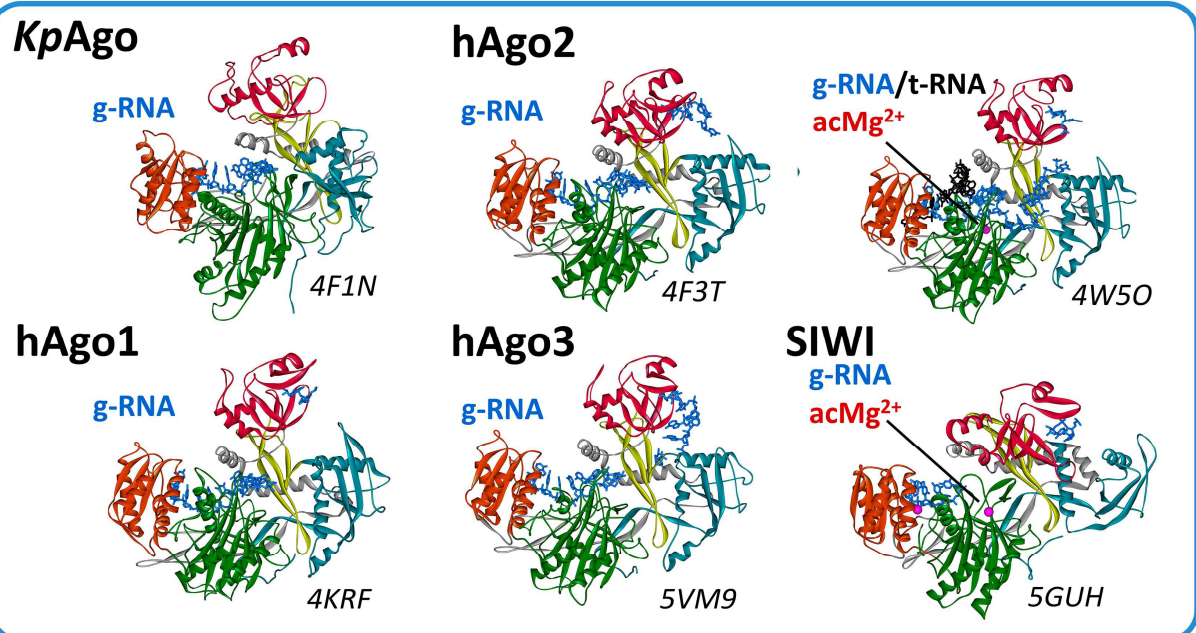

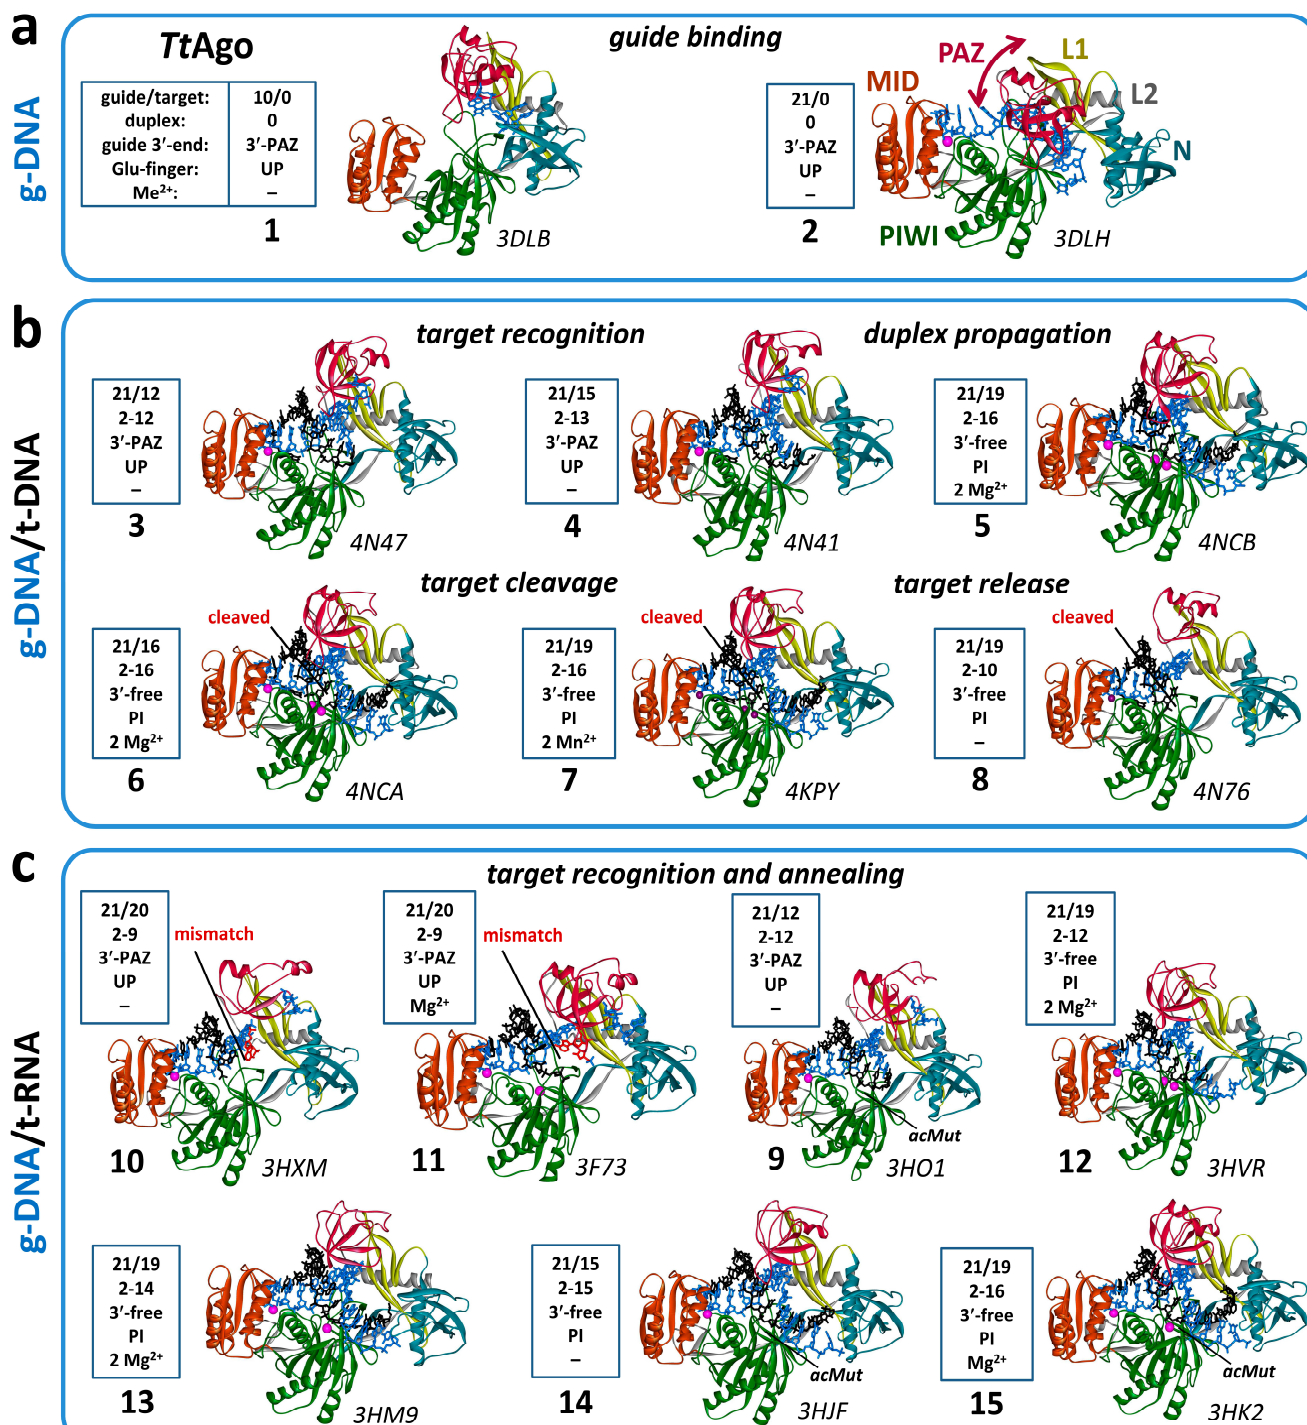

**Supplementary Fig. 2. Structures of the TtAgo complexes at different steps of the catalytic cycle.**

(a) Binary complexes with guide DNA (1-2)<sup>1</sup>. (b) Ternary complexes with guide DNA and target DNA (3-8)<sup>2</sup>. The numbering of the structures corresponds to consecutive steps of the catalytic cycle of TtAgo: 1-2 – g-DNA binding; 3-4 – t-DNA recognition; 5 – duplex propagation and catalytic Me<sup>2+</sup> binding; 6-7 – t-DNA cleavage with Mg<sup>2+</sup> and Mn<sup>2+</sup> ions; 8 – t-DNA release (crystallized after heating the complex at 55°C). (c) Ternary complexes with guide DNA and target RNA (9-15) with increasing lengths of the duplex<sup>3,4</sup>. Complexes 9 and 10 contain mismatches at guide positions 10 and 11; complexes 11, 14 and 15 were obtained with TtAgo containing substitutions of the catalytic residues in the active centre (*acMut*) (see Table S1 for details).

The key shown next to each structure indicates the lengths of the guide/target strands used for crystallization; positions of the guide strand paired with the target; location of the guide 3'-end (bound to PAZ or free); conformation of the glutamate finger in the active site (UP, 'unplugged'; PI, 'plugged in'); and the presence of catalytic Me<sup>2+</sup> ions in the active centre.



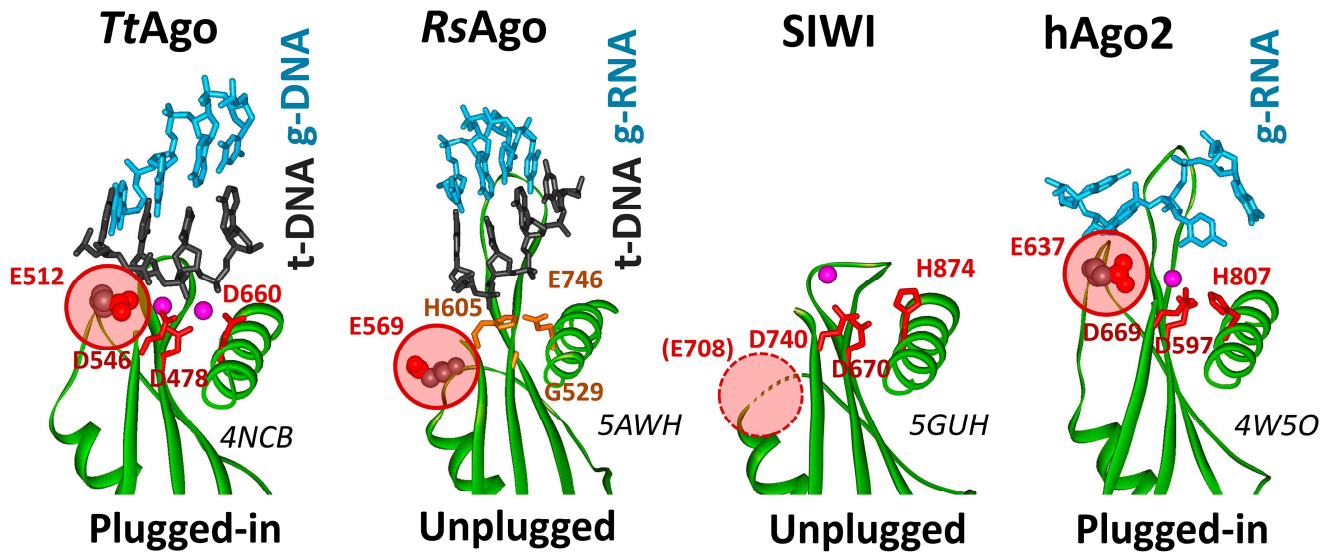

**Supplementary Fig. 3. Variations in the active site conformations of pAgos and eAgos.**

The glutamate finger is indicated with a red circle. The active site of TtAgo adopts the plugged-in conformation after target binding<sup>2</sup>. RsAgo contains substitutions of the catalytic residues (orange) and remains in the unplugged state even after target binding<sup>6</sup>. The SIWI protein is seen in the unplugged conformation in the absence of target RNA<sup>7</sup>. hAgo2 adopts the plugged-in state even in the absence of a target<sup>8</sup>. The PDB accession number is shown next to each structure



## TtAgo

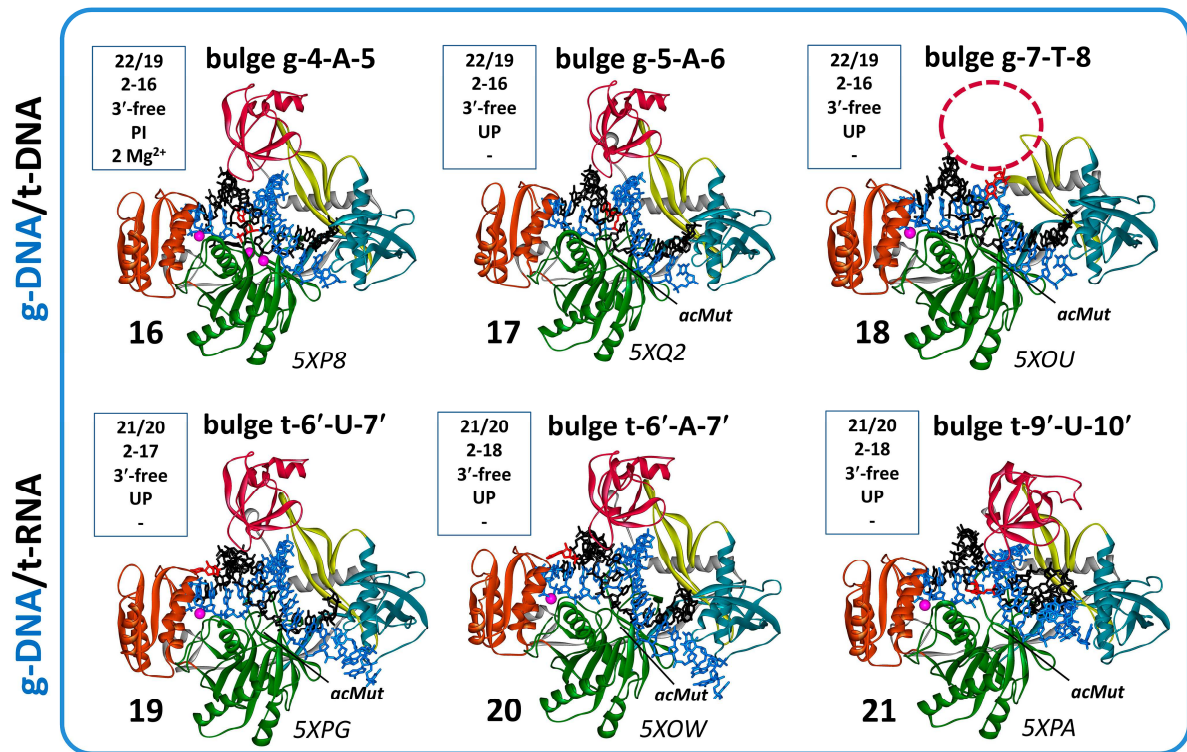

## RsAgo

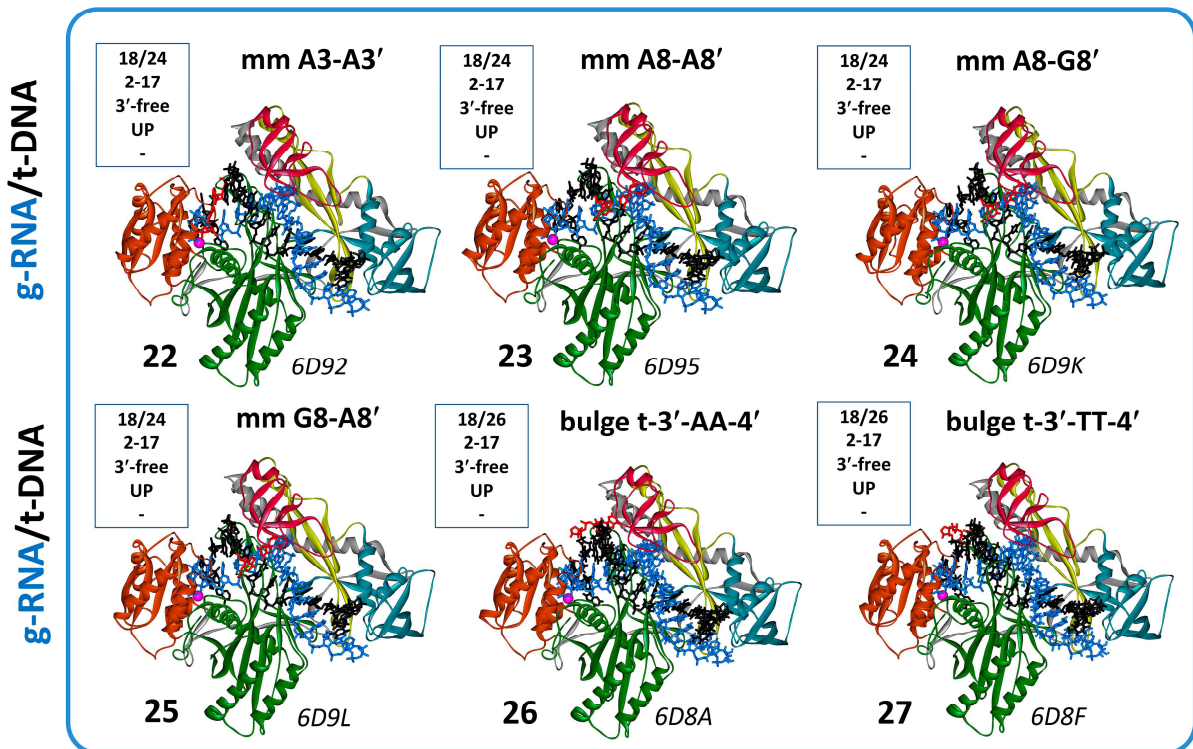

**Supplementary Fig. 4. Structures of TtAgo<sup>18</sup> (top) and RsAgo<sup>5</sup> (bottom) ternary complexes with bulges and mismatches in the guide or target nucleic acid strands.**

All designations correspond to Fig. 2. Positions and the identity of the bulged and mismatched nucleotides in each complex are indicated (e.g. g-4-A-5 corresponds to bulged A between 4<sup>th</sup> and 5<sup>th</sup> nucleotides of the guide strand; t-6'-U-7' corresponds to bulged U between 6<sup>th</sup> and 7<sup>th</sup> nucleotides in the target strand; mm A3-A3' corresponds to mismatch at position 3; etc.). Most complexes of TtAgo were obtained with the inactive D546N mutant (acMut). The PAZ domain was not resolved on the 5XOU structure.

### Supplementary Table 1. Characteristics of published structures of pAgo and eAgo proteins and their complexes with nucleic acids

All listed structures are presented in Supplementary Fig. 1 (various pAgos and eAgos), Fig. 2 (complexes of TtAgo at different steps of its functional cycle) and Fig. 4 (ternary complexes of TtAgo and RsAgo with bulges and mismatches). The PDB accession number is shown for each complex; the numbers in bold correspond to complexes of TtAgo and RsAgo shown in Supplementary Fig. 2 and 4.

| Ago/Host                                                                        | Nucleic acid specificity <i>in vitro</i> |                           | Structural features                                                                      |                                       |                            |                                                                          |                                                                                                               |        | Ref. |
|---------------------------------------------------------------------------------|------------------------------------------|---------------------------|------------------------------------------------------------------------------------------|---------------------------------------|----------------------------|--------------------------------------------------------------------------|---------------------------------------------------------------------------------------------------------------|--------|------|
|                                                                                 |                                          |                           | Active site                                                                              |                                       | MID-pocket                 | Bound nucleic acids                                                      |                                                                                                               | PDB ID |      |
|                                                                                 | Guide                                    | Target                    | Catalytic tetrad                                                                         | Glu-finger position; Me <sup>2+</sup> |                            | g-DNA/t-RNA                                                              | Scheme<br>(guide strand, blue; target strand, black; unpaired bases, underlined; unmodeled nucleotides, grey) |        |      |
| <b>AaAgo</b><br><i>Aquifex aeolicus</i><br><br>hyper-thermophilic bacteria      | DNA                                      | RNA (DNA not tested)      | D <sup>502</sup> E <sup>541</sup><br>D <sup>571</sup> D <sup>683</sup>                   | Unplugged                             | Empty                      | None                                                                     | -                                                                                                             | 1YVU   | 9    |
|                                                                                 |                                          |                           | Unplugged                                                                                | Empty                                 | Symmetric 22 nt RNA duplex | 5' P-AGACAGCAUUAUUGCUGUCUUU-3'<br>3' -UUUCUGUCGUAUUAUCGACAGA-P5'         | Externally bound to the PAZ domain                                                                            | 2F8S   | 10   |
|                                                                                 |                                          |                           | Unplugged                                                                                | Empty                                 | Symmetric 26 nt RNA duplex | 5' P-AGACAGCAUGCAUGCAUGCUGUCUUU-3'<br>3' -UUUCUGUCGUACGUACGUACGACAGA-P5' | Externally bound to the PAZ domain                                                                            | 2F8T   |      |
|                                                                                 |                                          |                           | Unplugged                                                                                | Empty                                 | None                       | -                                                                        |                                                                                                               | 2NUB   | 11   |
| <b>AfAgo</b><br><i>Archaeoglobus fulgidus</i><br><br>hyper-thermophilic archaea | DNA (RNA)                                | DNA (RNA, lower affinity) | Inactive<br>(G <sup>186</sup> , E <sup>221</sup> , R <sup>257</sup> , K <sup>394</sup> ) | -                                     | Empty                      | None                                                                     | -                                                                                                             | 1W9H   | 12   |
|                                                                                 |                                          |                           | -                                                                                        | 5'-P, Mn <sup>2+</sup>                | Symmetric 16 nt RNA duplex | 5' P-UUCGACGCGUCGAAUU-3'<br>3' -UUAAGCUGCGCAGCUU-P5'                     |                                                                                                               | 2BGG   | 13   |
|                                                                                 |                                          |                           | -                                                                                        | 5'-P, Mg <sup>2+</sup>                | Symmetric 21 nt RNA duplex | 5' P-AGACAGCAUUAUGCUGUCUUU-3'<br>3' -UUUCUGUCGUAUUAUCGACAGA-P5'          |                                                                                                               | 1YTU   | 14   |
|                                                                                 |                                          |                           | -                                                                                        | 5'-P, Mn <sup>2+</sup>                | Symmetric 16 ntDNA duplex  | 5' P-TTCGACGCGTCAATT-3'<br>3' -TTAAGCTGCGCAGCTT-P5'                      |                                                                                                               | 2W42   | 15   |

|                                                                                    |     |                           |                                                                           |                             |                        |                             |                                                                                            |        |    |
|------------------------------------------------------------------------------------|-----|---------------------------|---------------------------------------------------------------------------|-----------------------------|------------------------|-----------------------------|--------------------------------------------------------------------------------------------|--------|----|
| <b>MpAgo</b><br><i>Marinitoga piezophila</i><br>thermo-piezophilic bacteria        | RNA | DNA (RNA, lower activity) | D <sup>446</sup> , E <sup>482</sup> , D <sup>515</sup> , N <sup>624</sup> | Unplugged                   | 5'-OH                  | 21 nt g-RNA                 | 5' OH- <u>UAUACAACCU</u> ACUACCUC <u>AAU</u> -3'                                           | 5I4A   | 16 |
|                                                                                    |     |                           |                                                                           | Unplugged                   | 5'-OH                  | 21 nt g-RNA/<br>21 nt t-DNA | 5' OH- <u>GGUACAACCU</u> ACUACCUC <u>AAU</u> -3'<br>3' - <u>CCATGTTGGATGATGGAGTAA</u> -P5' | 5UX0   | 17 |
| <b>MjAgo</b><br><i>Methanocaldococcus jannaschii</i><br>hyper-thermophilic archaea | DNA | DNA                       | D <sup>504</sup> , E <sup>541</sup> , D <sup>570</sup> , D <sup>688</sup> | Unplugged                   | Empty                  | None                        | -                                                                                          | 5G5S   | 18 |
|                                                                                    |     |                           |                                                                           | Unplugged                   | 5'-P, Mg <sup>2+</sup> | 21 nt g-DNA                 | 5' P- <u>TGAGGTAG</u> TAGGTTGTATAGT-3'                                                     | 5G5T   |    |
| <b>PfAgo</b><br><i>Pyrococcus furiosus</i><br>hyper-thermophilic archaea           | DNA | DNA                       | D <sup>558</sup> , E <sup>596</sup> , D <sup>628</sup> , H <sup>745</sup> | Unplugged                   | Empty                  | None                        | -                                                                                          | 1U04   | 19 |
|                                                                                    |     |                           |                                                                           | Unplugged, Mn <sup>2+</sup> | Empty                  | None                        | -                                                                                          | 1Z25   | 20 |
|                                                                                    |     |                           |                                                                           | Unplugged                   | Empty                  | None                        | -                                                                                          | 1Z26   |    |
| <b>TtAgo</b><br><i>Thermus thermophilus</i><br>thermophilic bacteria               | DNA | DNA (RNA, lower activity) | D <sup>478</sup> , E <sup>512</sup> , D <sup>546</sup> , D <sup>660</sup> | Unplugged                   | Empty                  | 10 nt g-DNA                 | 5' P- <u>TGAGGTAGTA</u> -3'                                                                | 3DLB 1 | 1  |
|                                                                                    |     |                           |                                                                           | Unplugged                   | 5'-P, Mg <sup>2+</sup> | 21 nt g-DNA                 | 5' P- <u>TGAGGTAG</u> TAGGTTGTATAGT-3'                                                     | 3DLH 2 |    |
|                                                                                    |     |                           |                                                                           | Unplugged                   | 5'-P, Mg <sup>2+</sup> | 21 nt g-DNA/<br>12 nt t-DNA | 5' P- <u>TGAGGTAG</u> TAGGTTGTATAGT-3'<br>3' - <u>GCTCCATCATCC</u> -5'                     | 4N47 3 | 2  |
|                                                                                    |     |                           |                                                                           | Unplugged                   | 5'-P, Mg <sup>2+</sup> | 21 nt g-DNA/<br>15 nt t-DNA | 5' P- <u>TGAGGTAG</u> TAGGTTGTATAGT-3'<br>3' - <u>GCTCCATCATCCAAC</u> -5'                  | 4N41   |    |



|  |  |  |  |                                   |                           |                             |                                                                                                                                            |            |   |
|--|--|--|--|-----------------------------------|---------------------------|-----------------------------|--------------------------------------------------------------------------------------------------------------------------------------------|------------|---|
|  |  |  |  |                                   |                           |                             | <b>4</b>                                                                                                                                   |            |   |
|  |  |  |  | Plugged in,<br>2 Mg <sup>2+</sup> | 5'-P,<br>Mg <sup>2+</sup> | 21 nt g-DNA/<br>19 nt t-DNA | 5' P-TGAGGTTAGTGGTTGTATAGT-3'<br>3'-GCTCCATCATCCAACATAT-5'<br>^<br>Cleaved between positions t10'-t11'                                     | 4NCB<br>5  |   |
|  |  |  |  | Plugged in,<br>2 Mg <sup>2+</sup> | 5'-P,<br>Mg <sup>2+</sup> | 21 nt g-DNA/<br>16 nt t-DNA | 5' P-TGAGGTTAGTGGTTGTATAGT-3'<br>3'-GCTCCATCATCCAACA-5'<br>^<br>Cleaved between positions t10'-t11'                                        | 4NCA<br>6  |   |
|  |  |  |  | Plugged in,<br>2 Mn <sup>2+</sup> | 5'-P,<br>Mn <sup>2+</sup> | 21 nt g-DNA/<br>19 nt t-DNA | 5' P-TGAGGTTAGTGGTTGTATAGT-3'<br>3'-GCTCCATCATCCAACATAT-5'<br>^<br>Cleaved between positions t10'-t11'                                     | 4KPY<br>7  |   |
|  |  |  |  | Unplugged                         | 5'-P,<br>Mn <sup>2+</sup> | 21 nt g-DNA/<br>19 nt t-DNA | 5' P-TGAGGTTAGTGGTTGTATAGT-3'<br>3'-GCTCCATCAT<br>^<br>Cleaved between positions t10'-t11'<br>and preheated at 55°C before crystallization | 4N76<br>8  |   |
|  |  |  |  | Unplugged                         | 5'-P,<br>Mg <sup>2+</sup> | 21 nt g-DNA/<br>20 nt t-RNA | 5' P-TGAGGTTAGTGGTTGTATAGT-3'<br>3'-UGCUCCAUCAUCAACAUAU-5'<br><br>Mismatches at positions g10-g11                                          | 3HXM<br>9  | 4 |
|  |  |  |  | Unplugged,<br>Mg <sup>2+</sup>    | 5'-P,<br>Mg <sup>2+</sup> | 21 nt g-DNA/<br>20 nt t-RNA | 5' P-TGAGGTTAGTGGTTGTATAGT-3'<br>3'-UGCUCCAUCAUCAACAUAU-5'<br><br>Mismatches at positions g10-g11                                          | 3F73<br>10 | 3 |
|  |  |  |  | Unplugged,<br>D546N<br>mutant     | 5'-P,<br>Mg <sup>2+</sup> | 21 nt g-DNA/<br>12 nt t-RNA | 5' P-TGAGGTTAGTGGTTGTATAGT-3'<br>3'-GCUCCAUCAUCC-5'                                                                                        | 3HO1<br>11 | 4 |
|  |  |  |  | Plugged in,<br>2 Mg <sup>2+</sup> | 5'-P,<br>Mg <sup>2+</sup> | 21 nt g-DNA/<br>19 nt t-RNA | 5' P-TGAGGTTAGTGGTTGTATAGT-3'<br>3'-GCUCCAUCAUCCAACAUAU-5'                                                                                 | 3HVR<br>12 |   |

|  |  |  |                                            |                           |                             |                                                                                |            |    |
|--|--|--|--------------------------------------------|---------------------------|-----------------------------|--------------------------------------------------------------------------------|------------|----|
|  |  |  | Plugged in,<br>Mg <sup>2+</sup>            | 5'-P,<br>Mg <sup>2+</sup> | 21 nt g-DNA/<br>19 nt t-RNA | 5' P-TGAGGTAGTAGGTTGTATAGT-3'<br>3'-GCUCCAUCAUCCAACAUAU-5'                     | 3HM9<br>13 |    |
|  |  |  | Plugged in,<br>D546E<br>mutant             | 5'-P,<br>Mg <sup>2+</sup> | 21 nt g-DNA/<br>15 nt t-RNA | 5' P-TGAGGTAGTAGGTTGTATAGT-3'<br>3'-GCUCCAUCAUCCAAC-5'                         | 3HJF<br>14 |    |
|  |  |  | Plugged in,<br>Mg <sup>2+</sup> ,<br>D478N | 5'-P,<br>Mg <sup>2+</sup> | 21 nt g-DNA/<br>19 nt t-RNA | 5' P-TGAGGTAGTAGGTTGTATAGT-3'<br>3'-GCUCCAUCAUCCAACAUAU-5'                     | 3HK2<br>15 |    |
|  |  |  | Plugged in,<br>2 Mg <sup>2+</sup>          | 5'-P,<br>Mg <sup>2+</sup> | 22 nt g-DNA/<br>19 nt t-DNA | g-4-A-5<br>5' P-TGAGAGTAGTAGGTTGTATAGT-3'<br>3'-GCTC_CATCATCCAACAUAU-5'        | 5XP8<br>16 | 21 |
|  |  |  | Unplugged,<br>D546N<br>mutant              | 5'-P                      | 22 nt g-DNA/<br>19 nt t-DNA | g-5-A-6<br>5' P-TGAGGATAGTAGGTTGTATAGT-3'<br>3'-GCTCC_ATCATCCAACAUAU-5'        | 5XQ2<br>17 |    |
|  |  |  | Unplugged,<br>D546N<br>mutant              | 5'-P,<br>Mg <sup>2+</sup> | 22 nt g-DNA/<br>19 nt t-DNA | g-7-T-8<br>5' P-TGAGGTATGTAGGTTGTATAGT-3'<br>3'-GCTCCAT_CATCCAACAUAU-5'        | 5XOU<br>18 |    |
|  |  |  | Unplugged,<br>D546N<br>mutant              | 5'-P,<br>Mg <sup>2+</sup> | 21 nt g-DNA/<br>20 nt t-RNA | t-6'-U-7'<br>5' P-TGAGGT_AGTAGGTTGTATAGT-3'<br>3'-GCUCCA_ACAUCCAACAUAU-5'<br>U | 5XPG<br>19 |    |
|  |  |  | Unplugged,<br>D546N<br>mutant              | 5'-P,<br>Mg <sup>2+</sup> | 21 nt g-DNA/<br>20 nt t-RNA | t-6'-A-7'<br>5' P-TGAGGT_AGTAGGTTGTATAGT-3'<br>3'-GCUCCA_UCAUCCAACAUAU-5'<br>A | 5XOW<br>20 |    |

|                                                                              |     |     |                                                                                             |                               |                           |                             |                                                                                                                                                                    |            |   |
|------------------------------------------------------------------------------|-----|-----|---------------------------------------------------------------------------------------------|-------------------------------|---------------------------|-----------------------------|--------------------------------------------------------------------------------------------------------------------------------------------------------------------|------------|---|
|                                                                              |     |     |                                                                                             | Unplugged,<br>D546N<br>mutant | 5'-P,<br>Mg <sup>2+</sup> | 21 nt g-DNA/<br>20 nt t-RNA | t-9'-U-10'<br>5' P-TGAGGTAGT <u>AGGTTGTATAGT</u> -3'<br>3'-GCUCCAUCU <u>GCCAACAU</u> AU-5'<br>U<br>Uracil loops-out of the duplex                                  | 5XPA<br>21 |   |
| <b>RsAgo</b><br><br><i>Rhodobacter<br/>sphaeroides</i><br><br>proteobacteria | RNA | DNA | Inactive<br>(G <sup>529</sup> , E <sup>569</sup> ,<br>H <sup>605</sup> , E <sup>746</sup> ) | Unplugged                     | 5'-P,<br>Mg <sup>2+</sup> | 18 nt g-RNA/<br>18 nt t-DNA | 5' P-UUACAACCUACUACCUCG-3'<br>3'-AATGTTGGATGATGGAGC-5'                                                                                                             | 5AWH       | 6 |
|                                                                              |     |     |                                                                                             |                               |                           | 18 nt g-RNA/<br>24 nt t-DNA | 5' P-UUACUGCACAGGUGACGA-3'<br>3'-GTC <u>CAAT</u> GACGTGTCCACTGCTGTC-5'                                                                                             | 6D8P       | 5 |
|                                                                              |     |     |                                                                                             |                               |                           | 18 nt g-RNA/<br>24 nt t-DNA | 5' P-UUACUGCACAGGUGACGA-3'<br>3'-GTC <u>CAAG</u> GACGTGTCCACTGCTGTC-5'<br>Mismatches (A3·A3' pair)                                                                 | 6D92<br>22 |   |
|                                                                              |     |     |                                                                                             |                               |                           | 18 nt g-RNA/<br>24 nt t-DNA | 5' P-UUACUGCACAGGUGACGA-3'<br>3'-GTC <u>CAAT</u> GACG <u>AG</u> TCCACTGCTGTC-5'<br>Mismatches (A8·A8' pair)                                                        | 6D95<br>23 |   |
|                                                                              |     |     |                                                                                             |                               |                           | 18 nt g-RNA/<br>24 nt t-DNA | 5' P-UUACUGCACAGGUGACGA-3'<br>3'-GTC <u>CAAT</u> GACG <u>GG</u> TCCACTGCTGTC-5'<br>Mismatches (A8·G8' pair)                                                        | 6D9K<br>24 |   |
|                                                                              |     |     |                                                                                             |                               |                           | 18 nt g-RNA/<br>24 nt t-DNA | 5' P-UUACUGC <u>CG</u> CAGGUGACGA-3'<br>3'-GTC <u>CAAT</u> GACG <u>AG</u> TCCACTGCTGTC-5'<br>Mismatches (G8·A8' pair)                                              | 6D9L<br>25 |   |
|                                                                              |     |     |                                                                                             |                               |                           | 18 nt g-RNA/<br>26 nt t-DNA | t-3'A4', A5'<br>5' P-UUA <u>   </u> CUGCACAGGUGACGA-3'<br>3'-GTC <u>CAAT</u> <u>   </u> GACGTGTCCACTGCTGTC-5'<br>AA<br>Adenine loops-out of the duplex (A-A bulge) | 6D8A<br>26 |   |
|                                                                              |     |     |                                                                                             |                               |                           | 18 nt g-RNA/<br>26 nt t-DNA | t-3'T4', T5'<br>5' P-UUA <u>   </u> CUGCACAGGUGACGA-3'<br>3'-GTC <u>CAAT</u> <u>   </u> GACGTGTCCACTGCTGTC-5'<br>TT<br>Thymine loops-out of the duplex (T-T bulge) | 6D8F<br>27 |   |



|                                                     |     |     |                                                                                             |                                 |                           |                              |                                                                    |      |    |
|-----------------------------------------------------|-----|-----|---------------------------------------------------------------------------------------------|---------------------------------|---------------------------|------------------------------|--------------------------------------------------------------------|------|----|
| <b>hAgo1</b><br><i>Homo sapiens</i>                 | RNA | RNA | Inactive<br>(D <sup>595</sup> , E <sup>635</sup> ,<br>D <sup>667</sup> , R <sup>805</sup> ) | Plugged in                      | 5'-P<br>Lys564            | 22 nt g-RNA                  | 5' P-UGAGGUAGUAGGUUGUAUAGUU-3'                                     | 4KRF | 22 |
| <b>hAgo2</b><br><i>Homo sapiens</i>                 | RNA | RNA | D <sup>597</sup> , E <sup>637</sup> ,<br>D <sup>669</sup> , H <sup>807</sup>                | Plugged in                      | 5'-P,<br>Lys566           | 20 nt<br>miR-20a             | 5' P-UAAAGUGCUUAUAGUGCAGG                                          | 4F3T | 23 |
|                                                     |     |     |                                                                                             | Plugged in;<br>Mg <sup>2+</sup> | 5'-P,<br>Lys566           | 21 nt g-RNA/<br>11 nt t- RNA | 5' P-UUCACAUUGCCCAAGUCUCUU-3'<br>3' -AAAAGUGUAAC-5'                | 4W5O | 8  |
| <b>hAgo3</b><br><i>Homo sapiens</i>                 | RNA | RNA | D <sup>598</sup> , E <sup>638</sup> ,<br>D <sup>670</sup> , H <sup>808</sup>                | Plugged in                      | 5'-P,<br>Lys567           | 21 nt g-RNA                  | 5' P-AAAAAAAA ... AAAAAUU-3'                                       | 5VM9 | 24 |
| <b>KpAGO</b><br><i>Kluyveromyces<br/>polysporus</i> | RNA | RNA | D <sup>974</sup> , E <sup>1013</sup> ,<br>D <sup>1046</sup> , D <sup>1198</sup>             | Plugged in                      | 5'-P<br>Lys939            | 8 nt guide<br>RNA            | 5' P-UAAAAAAAA-3'                                                  | 4F1N | 25 |
| <b>SIWI</b><br><i>Bombyx mori</i>                   | RNA | RNA | D <sup>670</sup> , E <sup>708</sup> ,<br>D <sup>740</sup> , H <sup>874</sup>                | Unplugged;<br>Mg <sup>2+</sup>  | 5'-P,<br>Mg <sup>2+</sup> | Endogenous<br>28 nt piRNA    | 5' P-UAUUU-5 ... 26-UUU <sub>m</sub> -3'<br>Um - 2'-O-methylated U | 5GUH | 7  |

## Supplementary References

1. Wang, Y., Sheng, G., Juranek, S., Tuschl, T. & Patel, D.J. Structure of the guide-strand-containing argonaute silencing complex. *Nature* **456**, 209-13 (2008).
2. Sheng, G. et al. Structure-based cleavage mechanism of *Thermus thermophilus* Argonaute DNA guide strand-mediated DNA target cleavage. *Proc Natl Acad Sci U S A* **111**, 652-7 (2014).
3. Wang, Y. et al. Structure of an argonaute silencing complex with a seed-containing guide DNA and target RNA duplex. *Nature* **456**, 921-6 (2008).
4. Wang, Y. et al. Nucleation, propagation and cleavage of target RNAs in Ago silencing complexes. *Nature* **461**, 754-61 (2009).
5. Liu, Y. et al. Accommodation of helical imperfections in *Rhodobacter sphaeroides* Argonaute ternary complexes with guide RNA and target DNA. *Cell Reports* **24**, 453-462 (2018).
6. Miyoshi, T., Ito, K., Murakami, R. & Uchiumi, T. Structural basis for the recognition of guide RNA and target DNA heteroduplex by Argonaute. *Nat Commun* **7**, 11846 (2016).

7. Matsumoto, N. et al. Crystal Structure of Silkworm PIWI-Clade Argonaute Siwi Bound to piRNA. *Cell* **167**, 484-497 e9 (2016).
8. Schirle, N.T., Sheu-Gruttadauria, J. & MacRae, I.J. Structural basis for microRNA targeting. *Science* **346**, 608-13 (2014).
9. Yuan, Y.R. et al. Crystal structure of *A. aeolicus* argonaute, a site-specific DNA-guided endoribonuclease, provides insights into RISC-mediated mRNA cleavage. *Mol Cell* **19**, 405-19 (2005).
10. Yuan, Y.R., Pei, Y., Chen, H.Y., Tuschl, T. & Patel, D.J. A potential protein-RNA recognition event along the RISC-loading pathway from the structure of *A. aeolicus* Argonaute with externally bound siRNA. *Structure* **14**, 1557-65 (2006).
11. Rashid, U.J. et al. Structure of *Aquifex aeolicus* argonaute highlights conformational flexibility of the PAZ domain as a potential regulator of RNA-induced silencing complex function. *J Biol Chem* **282**, 13824-32 (2007).
12. Parker, J.S., Roe, S.M. & Barford, D. Crystal structure of a PIWI protein suggests mechanisms for siRNA recognition and slicer activity. *EMBO J* **23**, 4727-37 (2004).
13. Parker, J.S., Roe, S.M. & Barford, D. Structural insights into mRNA recognition from a PIWI domain-siRNA guide complex. *Nature* **434**, 663-6 (2005).
14. Ma, J.B. et al. Structural basis for 5'-end-specific recognition of guide RNA by the *A. fulgidus* Piwi protein. *Nature* **434**, 666-70 (2005).
15. Parker, J.S., Parizotto, E.A., Wang, M., Roe, S.M. & Barford, D. Enhancement of the seed-target recognition step in RNA silencing by a PIWI/MID domain protein. *Mol Cell* **33**, 204-14 (2009).
16. Kaya, E. et al. A bacterial Argonaute with noncanonical guide RNA specificity. *Proc Natl Acad Sci U S A* **113**, 4057-62 (2016).
17. Doxzen, K.W. & Doudna, J.A. DNA recognition by an RNA-guided bacterial Argonaute. *PLoS One* **12**, e0177097 (2017).
18. Willkomm, S. et al. Structural and mechanistic insights into an archaeal DNA-guided Argonaute protein. *Nat Microbiol* **2**, 17035 (2017).
19. Song, J.J., Smith, S.K., Hannon, G.J. & Joshua-Tor, L. Crystal structure of Argonaute and its implications for RISC slicer activity. *Science* **305**, 1434-7 (2004).
20. Rivas, F.V. et al. Purified Argonaute2 and an siRNA form recombinant human RISC. *Nat Struct Mol Biol* **12**, 340-9 (2005).
21. Sheng, G. et al. Structure/cleavage-based insights into helical perturbations at bulge sites within *T. thermophilus* Argonaute silencing complexes. *Nucleic Acids Res* **45**, 9149-9163 (2017).
22. Faehnle, C.R., Elkayam, E., Haase, A.D., Hannon, G.J. & Joshua-Tor, L. The making of a slicer: activation of human Argonaute-1. *Cell Rep* **3**, 1901-9 (2013).
23. Elkayam, E. et al. The structure of human argonaute-2 in complex with miR-20a. *Cell* **150**, 100-10 (2012).
24. Park, M.S. et al. Human Argonaute3 has slicer activity. *Nucleic Acids Res* **45**, 11867-11877 (2017).
25. Nakanishi, K., Weinberg, D.E., Bartel, D.P. & Patel, D.J. Structure of yeast Argonaute with guide RNA. *Nature* **486**, 368-74 (2012).
